# Supplementary material for: Five Years Monitoring the Emergence of Unregulated Toxins in Shellfish in France (EMERGTOX 2018–2022)
Source: MDPI journal article supplement (doi:10.3390/md21080435), 2023-07-31
Supplement: s1 [file s1]

Table S1. Recoveries of lipophilic toxins and domoic acid.

| <b>Toxin</b>   | <b>Mean Recovery (%)</b> |
|----------------|--------------------------|
| OA             | 99.0                     |
| DTX2           | 98.9                     |
| DTX1           | 98.9                     |
| YTX            | 85.2                     |
| homo YTX       | 82.9                     |
| AZA1           | 95.8                     |
| PTX2           | 96.7                     |
| SPX-13-desMe-C | 92.0                     |
| PnTX G         | 94.3                     |
| PnTX A         | 93.3                     |
| GYM A          | 92.8                     |
| BTX3           | 94.1                     |
| PLTX           | 86.8                     |
| MC-RR          | 87.2                     |
| Nod-R          | 84.7                     |
| dmMC-RR        | 85.0                     |
| MC-LA          | 91.1                     |
| MC-LF          | 86.7                     |
| MC-LY          | 88.6                     |
| MC-LW          | 85.1                     |
| dmMC-LR        | 84.7                     |
| MC-LR          | 85.0                     |
| MC-YR          | 83.2                     |
| DA             | 81.5                     |

Table S2. Detection and quantification limits (LOD, LOQ) of unregulated lipophilic toxins in shellfish.

| <b>Lipophilic Toxins</b>    | <b>LOD (µg/kg)</b> | <b>LOQ (µg/kg)</b> |
|-----------------------------|--------------------|--------------------|
| PTXs, PnTXs (except PnTX-A) | 1.2                | 3.5                |
| PnTXA, GYMs                 | 2.0                | 6.0                |
| PLTX, OVTXs                 | 150.0              | 450.0              |
| BTXs                        | 23.0               | 70.0               |
| MCRR                        | 1.3                | 4.0                |
| NodR                        | 1.5                | 4.5                |
| dmMCRR                      | 3.0                | 9.0                |
| MCLA, MCLF, MCLY            | 2.7                | 8.0                |
| MCLW                        | 5.0                | 15.0               |
| dmMCLR, MCLR, MCYR          | 10.0               | 30.0               |



Table S3: Recovery of Saxitoxin, Tetrodotoxin, Anatoxin and Cylindrospermopsin groups in Shellfish

| Toxins  | Mean Recovery (%) |
|---------|-------------------|
| STX     | 99.0              |
| dc-STX  | 107.5             |
| NEO     | 80.7              |
| dc-NEO  | 89.5              |
| TTX     | 93.3              |
| C1      | 102.0             |
| C2      | 91.5              |
| GTX1    | 95.5              |
| GTX2    | 100.0             |
| GTX3    | 87.4              |
| GTX4    | 91.8              |
| GTX5    | 97.0              |
| GTX6    | 85.0              |
| dc-GTX2 | 100.0             |
| dc-GTX3 | 92.0              |
| ATX     | 94.0              |
| CYN     | 95.8              |
| do-CYN  | 72.3              |

Table S4. Detection and quantification limits (LOD, LOQ) of unregulated hydrophilic toxins in shellfish

| Hydrophylic Toxins | LOD (µg/kg) | LOQ (µg/Kg) |
|--------------------|-------------|-------------|
| TTX                | 11          | 30          |
| ATX                | 8           | 17.5        |
| CYN                | 2           | 5           |
| doCYN              | 3           | 5           |



Table 5. Recovery of BMAA, DAB and AEG in *Shellfish*

| Toxin   | Mean Recovery (%) |
|---------|-------------------|
| BMAA    | 48                |
| D3 BMAA | 50                |
| DAB     | 50                |
| D5 DAB  | 48                |
| AEG     | 61                |

Table S6. Elution gradients used for the three methods of lipophilic toxins and domoic acid analysis

| OA, DTXs, YTXs |                                    | AZAs, PTXs, SPXs, PnTXs, GYMs, BTXs, PLTX/OVTX |      | DA, MCs, NOD |      |
|----------------|------------------------------------|------------------------------------------------|------|--------------|------|
| Temps (min)    | Proportion of mobile phase B (% B) | Temps (min)                                    | % B  | Temps (min)  | % B  |
| 0.0            | 30%                                | 0.0                                            | 30%  | 0.0          | 5%   |
| 1.0            | 70%                                | 1.0                                            | 70%  | 1.0          | 50%  |
| 8.0            | 85%                                | 10.0                                           | 95%  | 8.9          | 90%  |
| 9.5            | 100%                               | 10.1                                           | 100% | 9.0          | 100% |
| 12.0           | 100%                               | 12.0                                           | 100% | 12.0         | 100% |
| 12.1           | 30%                                | 12.1                                           | 30%  | 12.1         | 5%   |
| 16.0           | 30%                                | 16.0                                           | 30%  | 16.0         | 5%   |

Table S7. Mass spectrometer parameters applied according to the ionisation mode.

|                        | OA, DTXs, YTXs<br>Negative ionization | AZAs, PTXs, SPXs, PnTXs, GYMs, BTXs, PLTX, OVTXs<br>Positive ionization | DA, MCs, NOD<br>Positive ionization |
|------------------------|---------------------------------------|-------------------------------------------------------------------------|-------------------------------------|
| Curtain gas (CUR)      | 20 psi                                | 20 psi                                                                  | 20 psi                              |
| Collision Gas (CAD)    | Medium                                | Medium                                                                  | Medium                              |
| IonSpray Voltage (IS)  | -4 500 V                              | 5 500 V                                                                 | 5 500 V                             |
| Temperature (TEM)      | 500 °C                                | 300 °C                                                                  | 550 °C                              |
| Ion Source Gas 1 (GS1) | 40 psi                                | 40 psi                                                                  | 40 psi                              |
| Ion Source Gas 2 (GS2) | 60 psi                                | 50 psi                                                                  | 55 psi                              |
| Interface Heater (ihe) | On                                    | On                                                                      | On                                  |



Table S8. Transitions for detection of unregulated lipophilic toxins and the source settings of mass spectrometer applied on the three sequence. Collision energy (CE), Declustering potential (DP), and collision cell exit potential (CXP)

Lipophilic toxin detected in positive ionization mode: PTXs, SPXs, PnTXs, GYMs, BTXs, PLTX

| Compounds            | Precursor ion (m/z) | Product ion <sup>1</sup> (m/z) | CE (eV) | DP (V) | CXP (V) |
|----------------------|---------------------|--------------------------------|---------|--------|---------|
| GYMA                 | 508.3               | 392.3 (q)                      | 49      | 111    | 9       |
|                      | 508.3               | 490.3 (Q)                      | 34      | 111    | 11      |
| GYMB                 | 524.3               | 488.3 (q)                      | 49      | 111    | 9       |
|                      | 524.3               | 506.3 (Q)                      | 34      | 111    | 11      |
| 13-19-didesMeC       | 678.5               | 430.3 (q)                      | 53      | 151    | 10      |
|                      | 678.5               | 164.2 (Q)                      | 68      | 151    | 12      |
| SPX-13-desMe-C       | 692.5               | 444.3 (q)                      | 53      | 151    | 10      |
|                      | 692.5               | 164.2 (Q)                      | 68      | 151    | 12      |
| SPXdesMeD            | 694.5               | 444.3 (q)                      | 53      | 151    | 10      |
|                      | 694.5               | 164.2 (Q)                      | 68      | 151    | 12      |
| PnTXG                | 694.5               | 458.3 (q)                      | 53      | 151    | 10      |
|                      | 694.5               | 164.2 (Q)                      | 68      | 151    | 12      |
| PnTXA                | 712.5               | 458.3 (q)                      | 53      | 151    | 10      |
|                      | 712.5               | 164.2 (Q)                      | 68      | 151    | 12      |
| PnTXF                | 766.5               | 488.3 (q)                      | 53      | 151    | 10      |
|                      | 766.5               | 164.2 (Q)                      | 68      | 151    | 12      |
| PnTXE                | 784.5               | 488.3 (q)                      | 53      | 151    | 10      |
|                      | 784.5               | 164.2 (Q)                      | 68      | 151    | 12      |
| PñTXABC              | 831.5               | 458.3 (q)                      | 53      | 151    | 10      |
|                      | 831.5               | 164.2 (Q)                      | 68      | 151    | 12      |
| PLTX                 | 1349.3              | 327.2 (q)                      | 47      | 69     | 7       |
|                      | 900.0               | 327.2 (Q)                      | 35      | 56     | 7       |
| OVTXA                | 1333.3              | 327.2 (q)                      | 47      | 69     | 7       |
|                      | 889.3               | 327.2 (Q)                      | 35      | 56     | 7       |
| PTX2                 | 876.5               | 805.5 (q)                      | 36      | 111    | 20      |
|                      | 876.5               | 823.5 (Q)                      | 33      | 111    | 20      |
| PTX1                 | 892.5               | 821.5 (q)                      | 36      | 111    | 20      |
|                      | 892.5               | 839.5 (Q)                      | 33      | 111    | 20      |
| PTX2sa et PTX2sa épi | 894.5               | 805.5 (q)                      | 36      | 111    | 20      |
|                      | 894.5               | 823.5 (Q)                      | 33      | 111    | 20      |
| PTX6                 | 906.5               | 853.5 (q)                      | 36      | 111    | 20      |
|                      | 906.5               | 871.5 (Q)                      | 33      | 111    | 20      |
| BTX2                 | 912.5               | 319.3 (q)                      | 37      | 81     | 7       |
|                      | 912.5               | 895.5 (Q)                      | 19      | 81     | 22      |
| BTX3                 | 914.5               | 807.5 (q)                      | 24      | 84     | 22      |
|                      | 914.5               | 725.5 (Q)                      | 33      | 84     | 18      |

<sup>1</sup> Q: Quantitative transition; q: qualifier transition



Lipophilic cyanotoxins detected in positive ionization mode : Microcystins (MCs) and nodularin (Nod-R)

| Compounds | Precursor ion (m/z) | Product ion <sup>1</sup> (m/z) | CE (eV) | DP (V) | CXP (V) |
|-----------|---------------------|--------------------------------|---------|--------|---------|
| dmMCRR    | 512.8               | 103.1 (q)                      | 88      | 98     | 6       |
|           | 512.8               | 135.1 (Q)                      | 40      | 98     | 10      |
| MCRR      | 519.8               | 103.1 (q)                      | 89      | 98     | 6       |
|           | 519.8               | 135.1 (Q)                      | 42      | 98     | 10      |
| NodR      | 825.5               | 103.1 (q)                      | 129     | 138    | 6       |
|           | 825.5               | 135.1 (Q)                      | 79      | 138    | 10      |
| MCLA      | 910.5               | 135.1 (q)                      | 81      | 146    | 9       |
|           | 910.5               | 776.5 (Q)                      | 27      | 146    | 18      |
| dmMCLR    | 981.5               | 103.1 (q)                      | 129     | 161    | 6       |
|           | 981.5               | 135.1 (Q)                      | 99      | 161    | 10      |
| MCLF      | 986.5               | 135.1 (q)                      | 88      | 154    | 9       |
|           | 986.5               | 852.5 (Q)                      | 33      | 154    | 20      |
| MCLR      | 995.5               | 103.1 (q)                      | 129     | 144    | 6       |
|           | 995.5               | 135.1 (Q)                      | 95      | 144    | 10      |
| MCLY      | 1002.5              | 135.1 (q)                      | 85      | 155    | 8       |
|           | 1002.5              | 868.5 (Q)                      | 29      | 155    | 20      |
| MCLW      | 1025.5              | 375.3 (q)                      | 54      | 156    | 10      |
|           | 1025.5              | 135.1 (Q)                      | 95      | 156    | 10      |
| MCYR      | 1045.5              | 103.1 (q)                      | 129     | 147    | 6       |
|           | 1045.5              | 135.1 (Q)                      | 100     | 147    | 10      |

<sup>1</sup> Q: Quantitative transition; q: qualifier transition

Table S9. Elution gradients used for the three methods of hydrophilic toxins analysis

| PSTs and TTXs analysis<br>(LC conditions A) |                                          |                        | ATXs and CYNs<br>(LC conditions B) |     |                        |
|---------------------------------------------|------------------------------------------|------------------------|------------------------------------|-----|------------------------|
| Time<br>(min)                               | Proportion of<br>mobile phase<br>B (% B) | Flow<br>rate<br>mL/min | Time<br>(min)                      | % B | Flow<br>rate<br>mL/min |
| 0.0                                         | 98%                                      | 0.4                    | 0.0                                | 98% | 0.4                    |
| 5.0                                         | 98%                                      | 0.4                    | 5.0                                | 98% | 0.4                    |
| 7.5                                         | 50%                                      | 0.4                    | 11.5                               | 50% | 0.4                    |
| 10.5                                        | 50%                                      | 0.4                    | 13.0                               | 50% | 0.5                    |
| 11.0                                        | 98%                                      | 0.4                    | 13.5                               | 98% | 0.5                    |
| 11.5                                        | 98%                                      | 0.8                    | 14.0                               | 98% | 0.8                    |
| 12.6                                        | 98%                                      | 0.8                    | 14.6                               | 98% | 0.8                    |
| 13.0                                        | 98%                                      | 0.4                    | 15.0                               | 98% | 0.4                    |



Table S10. Compound-dependent tandem mass spectrometry parameters for the unregulated hydrophilic toxins screened

| Compounds                  | Ionisation mode | Precursor ion (m/z) | Product ion <sup>1</sup> (m/z) | CE (eV) | S-Lens (V) |
|----------------------------|-----------------|---------------------|--------------------------------|---------|------------|
| TTX/4-epi-TTX              | Positive        | 320.1               | 302.1(Q)                       | 22      | 98         |
|                            | Positive        | 320.1               | 162.1 (q)                      | 36      | 98         |
| 5,6,11-trideoxy-TTX        | Positive        | 272.1               | 254.1 (Q)                      | 30      | 120        |
|                            | Positive        | 272.1               | 162.1 (q)                      | 35      | 120        |
| 4,9-anhydro-TTX            | Positive        | 302.0               | 162.1 (Q)                      | 32      | 147        |
|                            | Positive        | 302.0               | 256.1 (q)                      | 25      | 147        |
| 5-deoxy-TTX / 11-deoxy-TTX | Positive        | 304.1               | 286.1 (Q)                      | 30      | 120        |
|                            | Positive        | 304.1               | 176.0 (q)                      | 30      | 120        |
| ATX                        | Positive        | 166.1               | 131.1 (Q)                      | 14      | 53         |
|                            | Positive        | 166.1               | 105.1 (q)                      | 16      | 53         |
| HATX                       | Positive        | 180.1               | 145.1 (Q)                      | 14      | 56         |
|                            | Positive        | 180.1               | 117.1 (q)                      | 20      | 56         |
| CYN                        | Positive        | 416.2               | 336.1 (Q)                      | 20      | 79         |
|                            | Positive        | 416.2               | 194.1 (q)                      | 34      | 79         |
| doCYN                      | Positive        | 400.1               | 194.1 (Q)                      | 32      | 99         |
|                            | Positive        | 400.1               | 320.1 (q)                      | 20      | 99         |

<sup>1</sup> Q: Quantitative transition; q: qualifier transition

Table S11. Source and MS parameters used for optimal detection of BMAA, DAB and internal standards.

| Compounds           | Precursor ion (m/z) | Product ion <sup>1</sup> (m/z) | CE (eV) | DP (V) | CXP (V) |
|---------------------|---------------------|--------------------------------|---------|--------|---------|
| BMAA                | 119                 | 88 (q)                         | 23      | 66     | 12      |
|                     | 119                 | 44 (Q)                         | 17      | 66     | 10      |
| D <sub>3</sub> BMAA | 122                 | 76 (q)                         | 27      | 41     | 10      |
|                     | 122                 | 47 (Q)                         | 17      | 41     | 12      |
| DAB                 | 119                 | 74 (q)                         | 11      | 86     | 8       |
|                     | 119                 | 101 (Q)                        | 19      | 86     | 8       |
| D <sub>5</sub> DAB  | 124                 | 78 (q)                         | 19      | 131    | 10      |
|                     | 124                 | 47 (Q)                         | 13      | 131    | 4       |
| AEG                 | 119                 | 102 (Q)                        | 13      | 81     | 12      |

<sup>1</sup> Q: Quantitative transition; q: qualifier transition



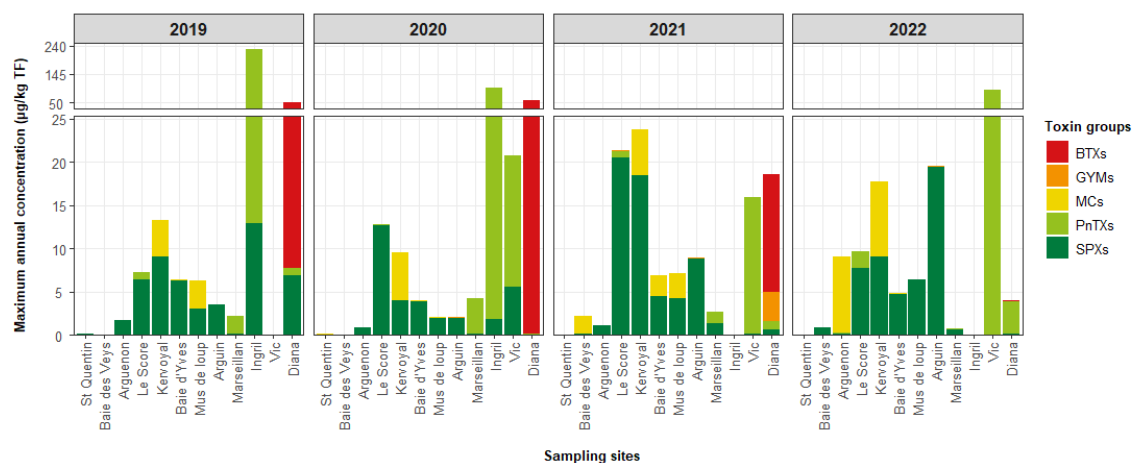

Fig. S1: maximum concentrations of unregulated toxins found in shellfish between 2019 and 2022 on the French coast
